# Supplementary material for: SpCas9- and LbCas12a-Mediated DNA Editing Produce Different Gene Knockout Outcomes in Zebrafish Embryos
Source: PubMed Central journal article supplement (PMC7397077; doi:10.3390/genes11070740), 2020-07-03
Supplement: genes-11-00740-s001.pdf [file genes-11-00740-s001.pdf]

**Table S1.** Sequences and scores of target sites used in this work.

| Group        | Name         | Sequence                 | On-Target Score [21] | Off-Target Score [22] | Number of Analyzed Embryos |
|--------------|--------------|--------------------------|----------------------|-----------------------|----------------------------|
| LbCas1<br>2a | slc6a4a<br>1 | TGCTGCTCTCCCCGTAC<br>TC  | NA                   | 49.6                  | 9                          |
|              | slc6a4a<br>2 | AGGAGATGTACTGCGAT<br>AAC | NA                   | 49.5                  | 7                          |
|              | slc6a4a<br>3 | TGATCCTTCTCCGGAACG<br>CT | NA                   | 49.9                  | 5                          |
|              | slc6a4<br>b1 | GAGGACCCGGGGCACAG<br>AGG | NA                   | 49.7                  | 9                          |
|              | slc6a4<br>b2 | CTCCATTTATCGCGGGAC<br>TC | NA                   | 49.9                  | 5                          |
|              | slc6a4<br>b3 | TTTTATCGGTCATTGGAT<br>TT | NA                   | 48.3                  | 7                          |
| SpCas9       | slc6a4a<br>4 | ATGATGAATCAAGAGTA<br>CGG | 78.6                 | 48.5                  | 10                         |
|              | slc6a4a<br>5 | TGCGGGCACTGGGACGG<br>ACA | 66.1                 | 48.6                  | 10                         |
|              | slc6a4a<br>6 | CAGAGTCCTAAATGTTCC<br>AG | 75.2                 | 46.6                  | 10                         |
|              | slc6a4<br>b4 | TTGGAGGACCCGGGGCA<br>CAG | 67.7                 | 48.5                  | 10                         |
|              | slc6a4<br>b5 | CGCCGGGTACAACAGCA<br>ACC | 61.6                 | 49.5                  | 10                         |
|              | slc6a4<br>b6 | ATTGGATTTGCGGTAGAC<br>CT | 62.7                 | 48.3                  | 10                         |

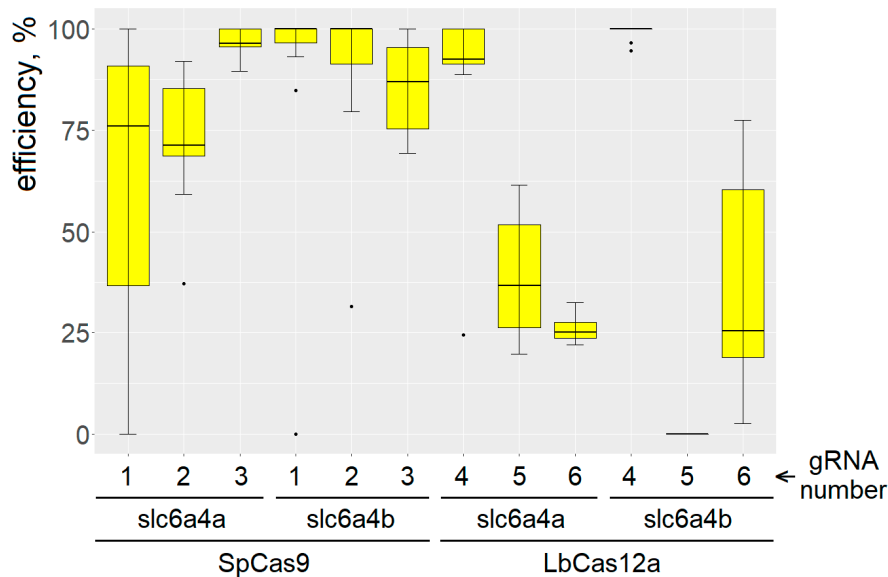

**Figure S1.** Efficiencies of editing by different groups of RNP complexes. LbCas12a with slc6a4b-crRNA2 did not demonstrate any editing efficiency in any embryo of the group.
